# Supplementary material for: High-fidelity discrete modeling of the HPA axis: a study of regulatory plasticity in biology
Source: PubMed Central journal article supplement (PMC6050677; doi:10.1186/s12918-018-0599-1), 2018-07-17

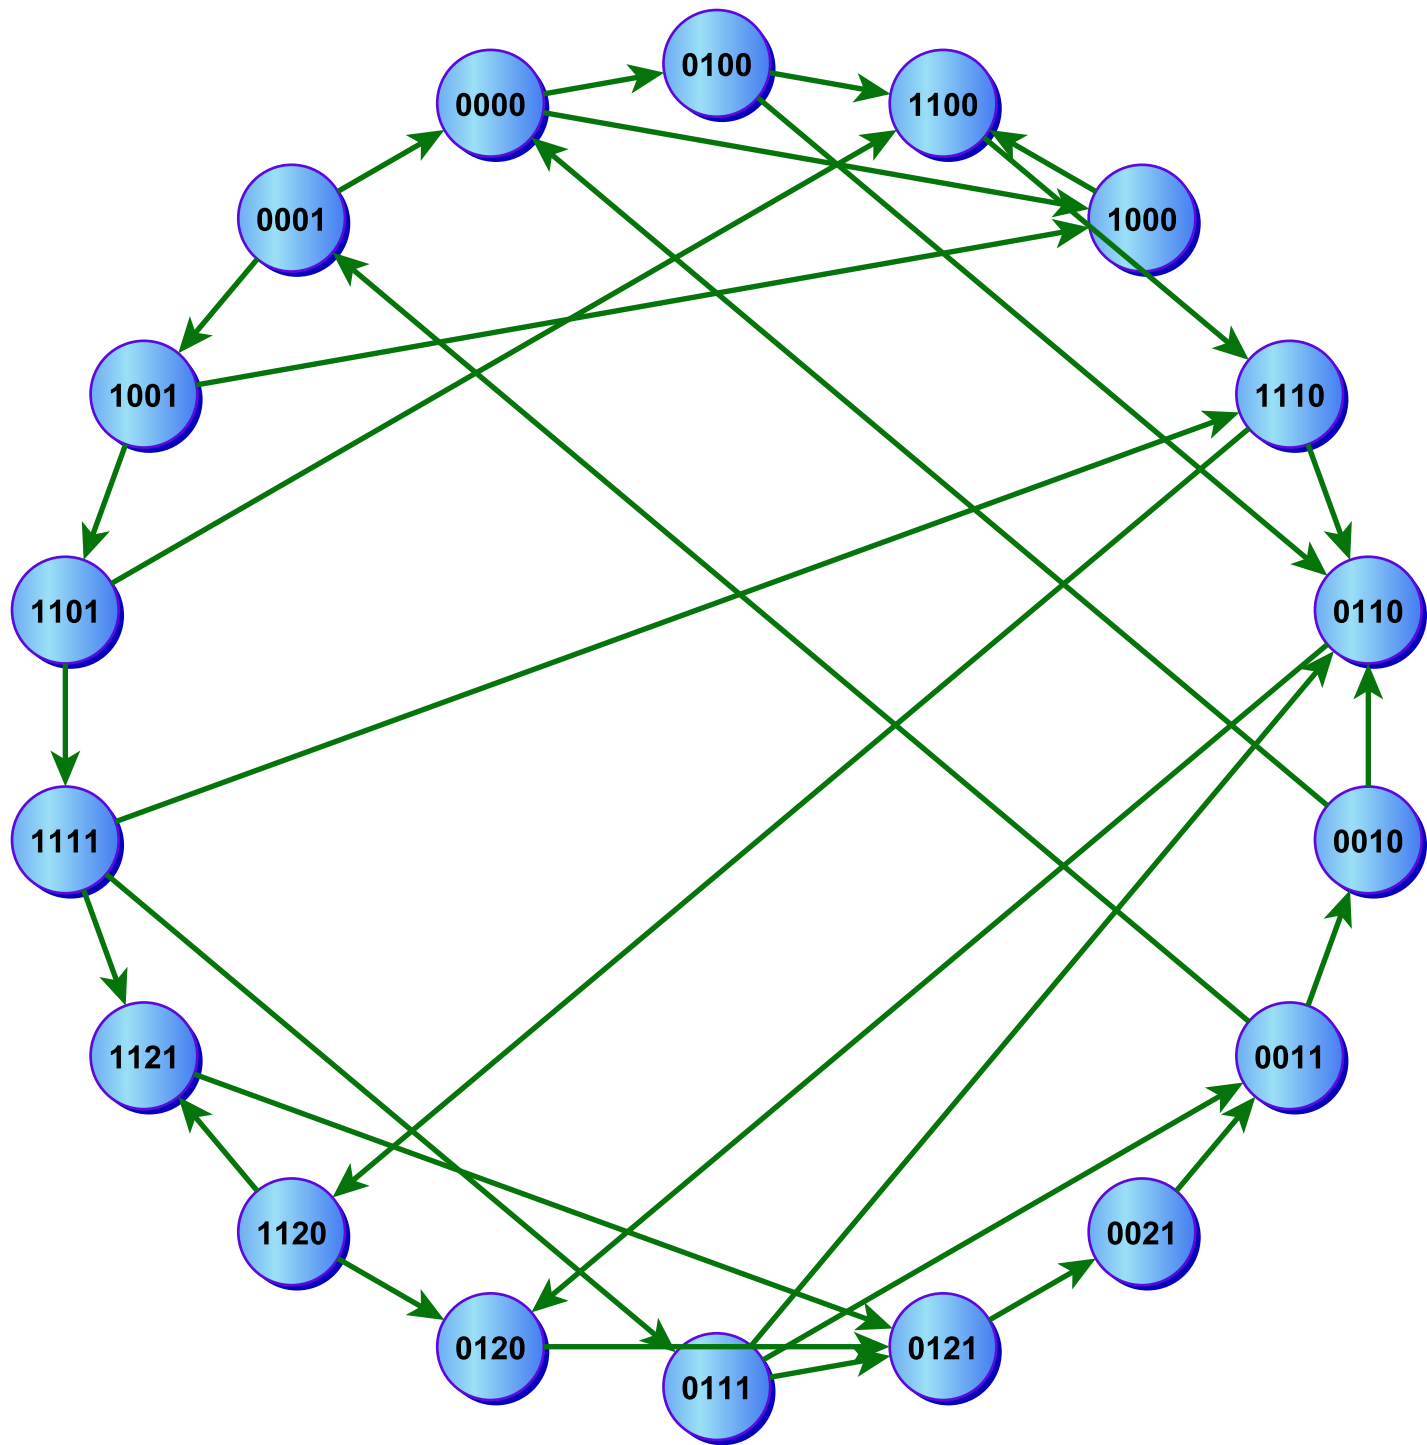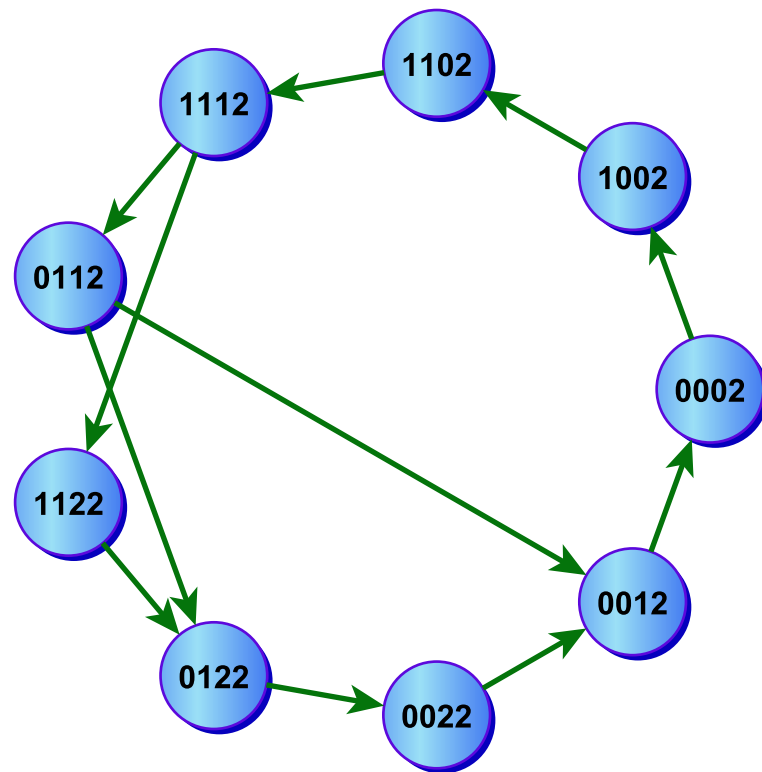

Supplement: 12918_2018_599_MOESM3_ESM.pdf [file 12918_2018_599_MOESM3_ESM.pdf]
