# Supplementary material for: High-fidelity discrete modeling of the HPA axis: a study of regulatory plasticity in biology
Source: PubMed Central journal article supplement (PMC6050677; doi:10.1186/s12918-018-0599-1), 2018-07-17
Supplement: 12918_2018_599_MOESM7_ESM.pdf [file 12918_2018_599_MOESM7_ESM.pdf]

# Additional File 3

Hooman Sedghamiz

December 6, 2017

## Algorithms for detection of Attractors

We use a variant of Tarjans [1] algorithm in order to detect regular and cyclic attractors. Algorithm 1 represents the pseudo-code of the method. In this approach, instead of storing the whole universe of possible states we use lexicographical indexing. Functions *LexToState()* (line 9) and *LexToInd()* (line 6) convert a scalar lexicographical index to its corresponding vector of states and vice versa. Algorithm 1 employs function *strongconnect()* (detailed in Algorithm 2) in order to compute the attractors.

---

**Algorithm 1:** Computing Attractors

---

```
input : ADJ, Regulatory graph adjacency list
         k, Logical parameters struct
         N, Max transcription level vector
         Delay, select (Asynch, Synch, Priority)
output: ATR, attractors
1 all_attractor(ADJ, k, N, Delay)
2 begin
   // initialize a struct V with the size of product(N[1:end])
3 L ← product(N[1:end]), S ← ∅, index ← 0, root_flag ← true
4 for i ← 1 : L do
5   |  $\left( (V.onStack[i], V.outedge[i]) \leftarrow false \right), (V.index[i], V.lowlink[i] \leftarrow 0)$ 
6 end
   // visit all vertices
7 for i ← 1 : L do
8   | if V.index[i] = 0 then
9   | | // Convert Lexicographical index to state vector
9   | | m ← LexToState(i, N)
10  | | ATR ← strongconnect(m)
11  | end
12 end
13 end
```

---

Algorithm 2 details the modified Strongly Connected Component (SCC) method of Tarjan in order to identify the leaves of SCC which in turn are the attractors. It employs the

*image()* line 4 function that implements the image function (see Eq. 11 in the article) in order to compute the successors of a state (vertex) based on the selected delay scheme (synch, asynch and priority with memory). More details about these functions as well as a modified depth first search function which enumerates the STG is available in the appendix of this document.

---

**Algorithm 2:** Modified SCC algorithm

---

```

input : m, a node from graph
1 strongconnect(m)
2 begin
3    $\left( (V.index[i], V.lowlink[i]) \leftarrow index \right), index \leftarrow index + 1$ 
4   S.push(v), ATR  $\leftarrow \emptyset$ , V.onStack[i]  $\leftarrow true$ , w  $\leftarrow image(ADJ, k, m, Delay)$ 
5   for  $i = 1 : w.size()$  do
6      $j \leftarrow LexToInd(w[i], N)$ 
7     if V.index[j] = 0 then
8       | strongconnect(w[i])
9       | V.lowlink[i]  $\leftarrow \min(V.lowlink[i], V.lowlink[j])$ 
10    else if V.onStack[j] = true then
11      | V.lowlink[i]  $\leftarrow \min(V.lowlink[i], V.index[j])$ 
12    else
13      | V.outedge[i]  $\leftarrow true$ 
14    end
15  end
16  if (V.lowlink[i] = V.index[i]) then
17    initialize a new SCC
18    while  $w \neq i$  do
19      |  $w \leftarrow S.pop()$ , V.onStack[w]  $\leftarrow false$ 
20      | add w to SCC
21    end
22    if root_flag = true then
23      | flag_attractor  $\leftarrow true$ 
24      | for  $i \leftarrow 1 : SCC.size()$  do
25        | if V.outedge[SCC[i]] = true then
26          | | flag_attractor  $\leftarrow false$ 
27          | | break
28        | end
29      | end
30    end
31    if flag_attractor then
32      | Report ATR  $\leftarrow SCC$  as attractor
33    else
34      | ATR  $\leftarrow \emptyset$ 
35    end
36    root_flag  $\leftarrow true$ 
37  end
38 end

```

---

## References

- [1] R. Tarjan. Enumeration of the Elementary Circuits of a Directed Graph, 1973.
